# Supplementary material for: Vitamin B12 Status and Gut Microbiota among Saudi Females with Obesity
Source: MDPI journal article supplement (doi:10.3390/foods11244007), 2022-12-11
Supplement: s1 [file s1]

**Supplementary Table S1.** General Characteristics of Participants Stratified by Serum Vitamin B12 Level,  
n=92

| Variables                   | Vitamin B12                          |                                    | P-value |
|-----------------------------|--------------------------------------|------------------------------------|---------|
|                             | High serum vitamin B12 > 404.0 pg/ml | Low serum vitamin B12≤ 404.0 pg/ml |         |
| Anthropometric Measurements |                                      |                                    |         |
| BMI (kg/m²)                 | 25.6 ± 6.9                           | 31.8 ± 8.2                         | <0.001  |
| WHR (ratio)                 | 0.7 ± 0.1                            | 0.8 ± 0.1                          | 0.05    |
| Body Fat (%)                | 39.7 ± 8.9                           | 45.6 ± 8.8                         | 0.003   |
| Muscle mass (%)             | 30.4 ± 6.3                           | 26.2 ± 6.7                         | 0.006   |
| Blood Analysis              |                                      |                                    |         |
| Total cholesterol (mmol/l)  | 3.6 ± 1.6                            | 4.6 ± 1.3                          | 0.003   |
| HDL- cholesterol (mmol/l)   | 0.9 ± 0.3                            | 1.1 ± 0.3                          | 0.096   |
| LDL- cholesterol (mmol/l)   | 2.5 ± 1.3                            | 3.3 ± 1.2                          | 0.008   |
| Total cholesterol/HDL ratio | 3.9 ± 1.2                            | 4.6 ± 2.0                          | 0.06    |
| Triglyceride (mmol/l) #     | 0.5 (0.4 - 0.8)                      | 0.9 (0.7 - 1.1)                    | <0.001  |
| FBG (mmol/l)                | 4.6 ± 0.9                            | 4.7 ± 0.5                          | 0.237   |
| Insulin (μIU/mL) #          | 7.3 (5.5 - 13.7)                     | 12.5 (8.6 - 18.3)                  | 0.007   |
| HOMA-IR #                   | 1.3 (1.0 - 3.0)                      | 2.5 (1.5 - 3.9)                    | 0.006   |
| HOMA-β #                    | 142.4 (90.7 - 208.7)                 | 211.9 (135.7 - 310.6)              | 0.007   |
| Vitamin B12 (pg/ml)         | 632.2 (474.3 - 724.1)                | 310.7 (267.9 - 359.7)              | <0.001  |
| Dietary History             |                                      |                                    |         |
| Energy intake (kcal/day)    | 3495.1 (2790.1 - 4454.9)             | 3383.2 (2658.3 - 4499.0)           | 0.93    |
| Fat intake (%)              | 36.6 (32.7 - 41.2)                   | 42.0 (34.4 - 46.7)                 | 0.04    |
| Vitamin B12 (mg/day)        | 8.7 (6.2 - 13.2)                     | 7.6 (4.9 - 13.1)                   | 0.46    |
| Dairy (gm/1000kcal)         | 84.5 (53.1 - 132.8)                  | 92.7 (51.6 - 123.8)                | 0.96    |
| Fruit (gm/1000kcal)         | 126.5 (72.4 - 211.5)                 | 79.0 (50.7 - 156.9)                | 0.04    |
| Vegetables (gm/1000kcal)    | 174.1 (104.9 - 220.6)                | 182.5 (137.8 - 283.7)              | 0.38    |
| Egg (gm/day)                | 25.7 (10.0 - 68.2)                   | 42.6 (9.8 - 74.6)                  | 0.59    |
| Chicken (gm/day)            | 87.7 (55.0 - 124.3)                  | 56.0 (12.4 - 109.8)                | 0.02    |
| Red meat (gm/day)           | 46.5 (31.3 - 71.4)                   | 39.1 (12.3 - 68.9)                 | 0.30    |

*Note:* Data presented as mean ± SD for normal variables whereas median (1st quartile – 3rd quartile) for non-normal variables; n (%) for categorical variables; # indicates non-normal variables. p<0.05 considered significant. Body mass index (BMI), waist-to-hip ratio (WHR), high-density lipoprotein (HDL), low-density lipoprotein (LDL), fasting blood glucose (FBG), homeostatic model assessment of insulin resistance (HOMA-IR), homeostatic model assessment of β-cell function (HOMA-β), Gram (gm), Milligram (mg).
